# Supplementary figures and images for: A Sporadic and Lethal Lassa Fever Case in Forest Guinea, 2019
Source: MDPI journal article supplement (doi:10.3390/v12101062), 2020-09-23

# Nucleoprotein, partial 630 nt

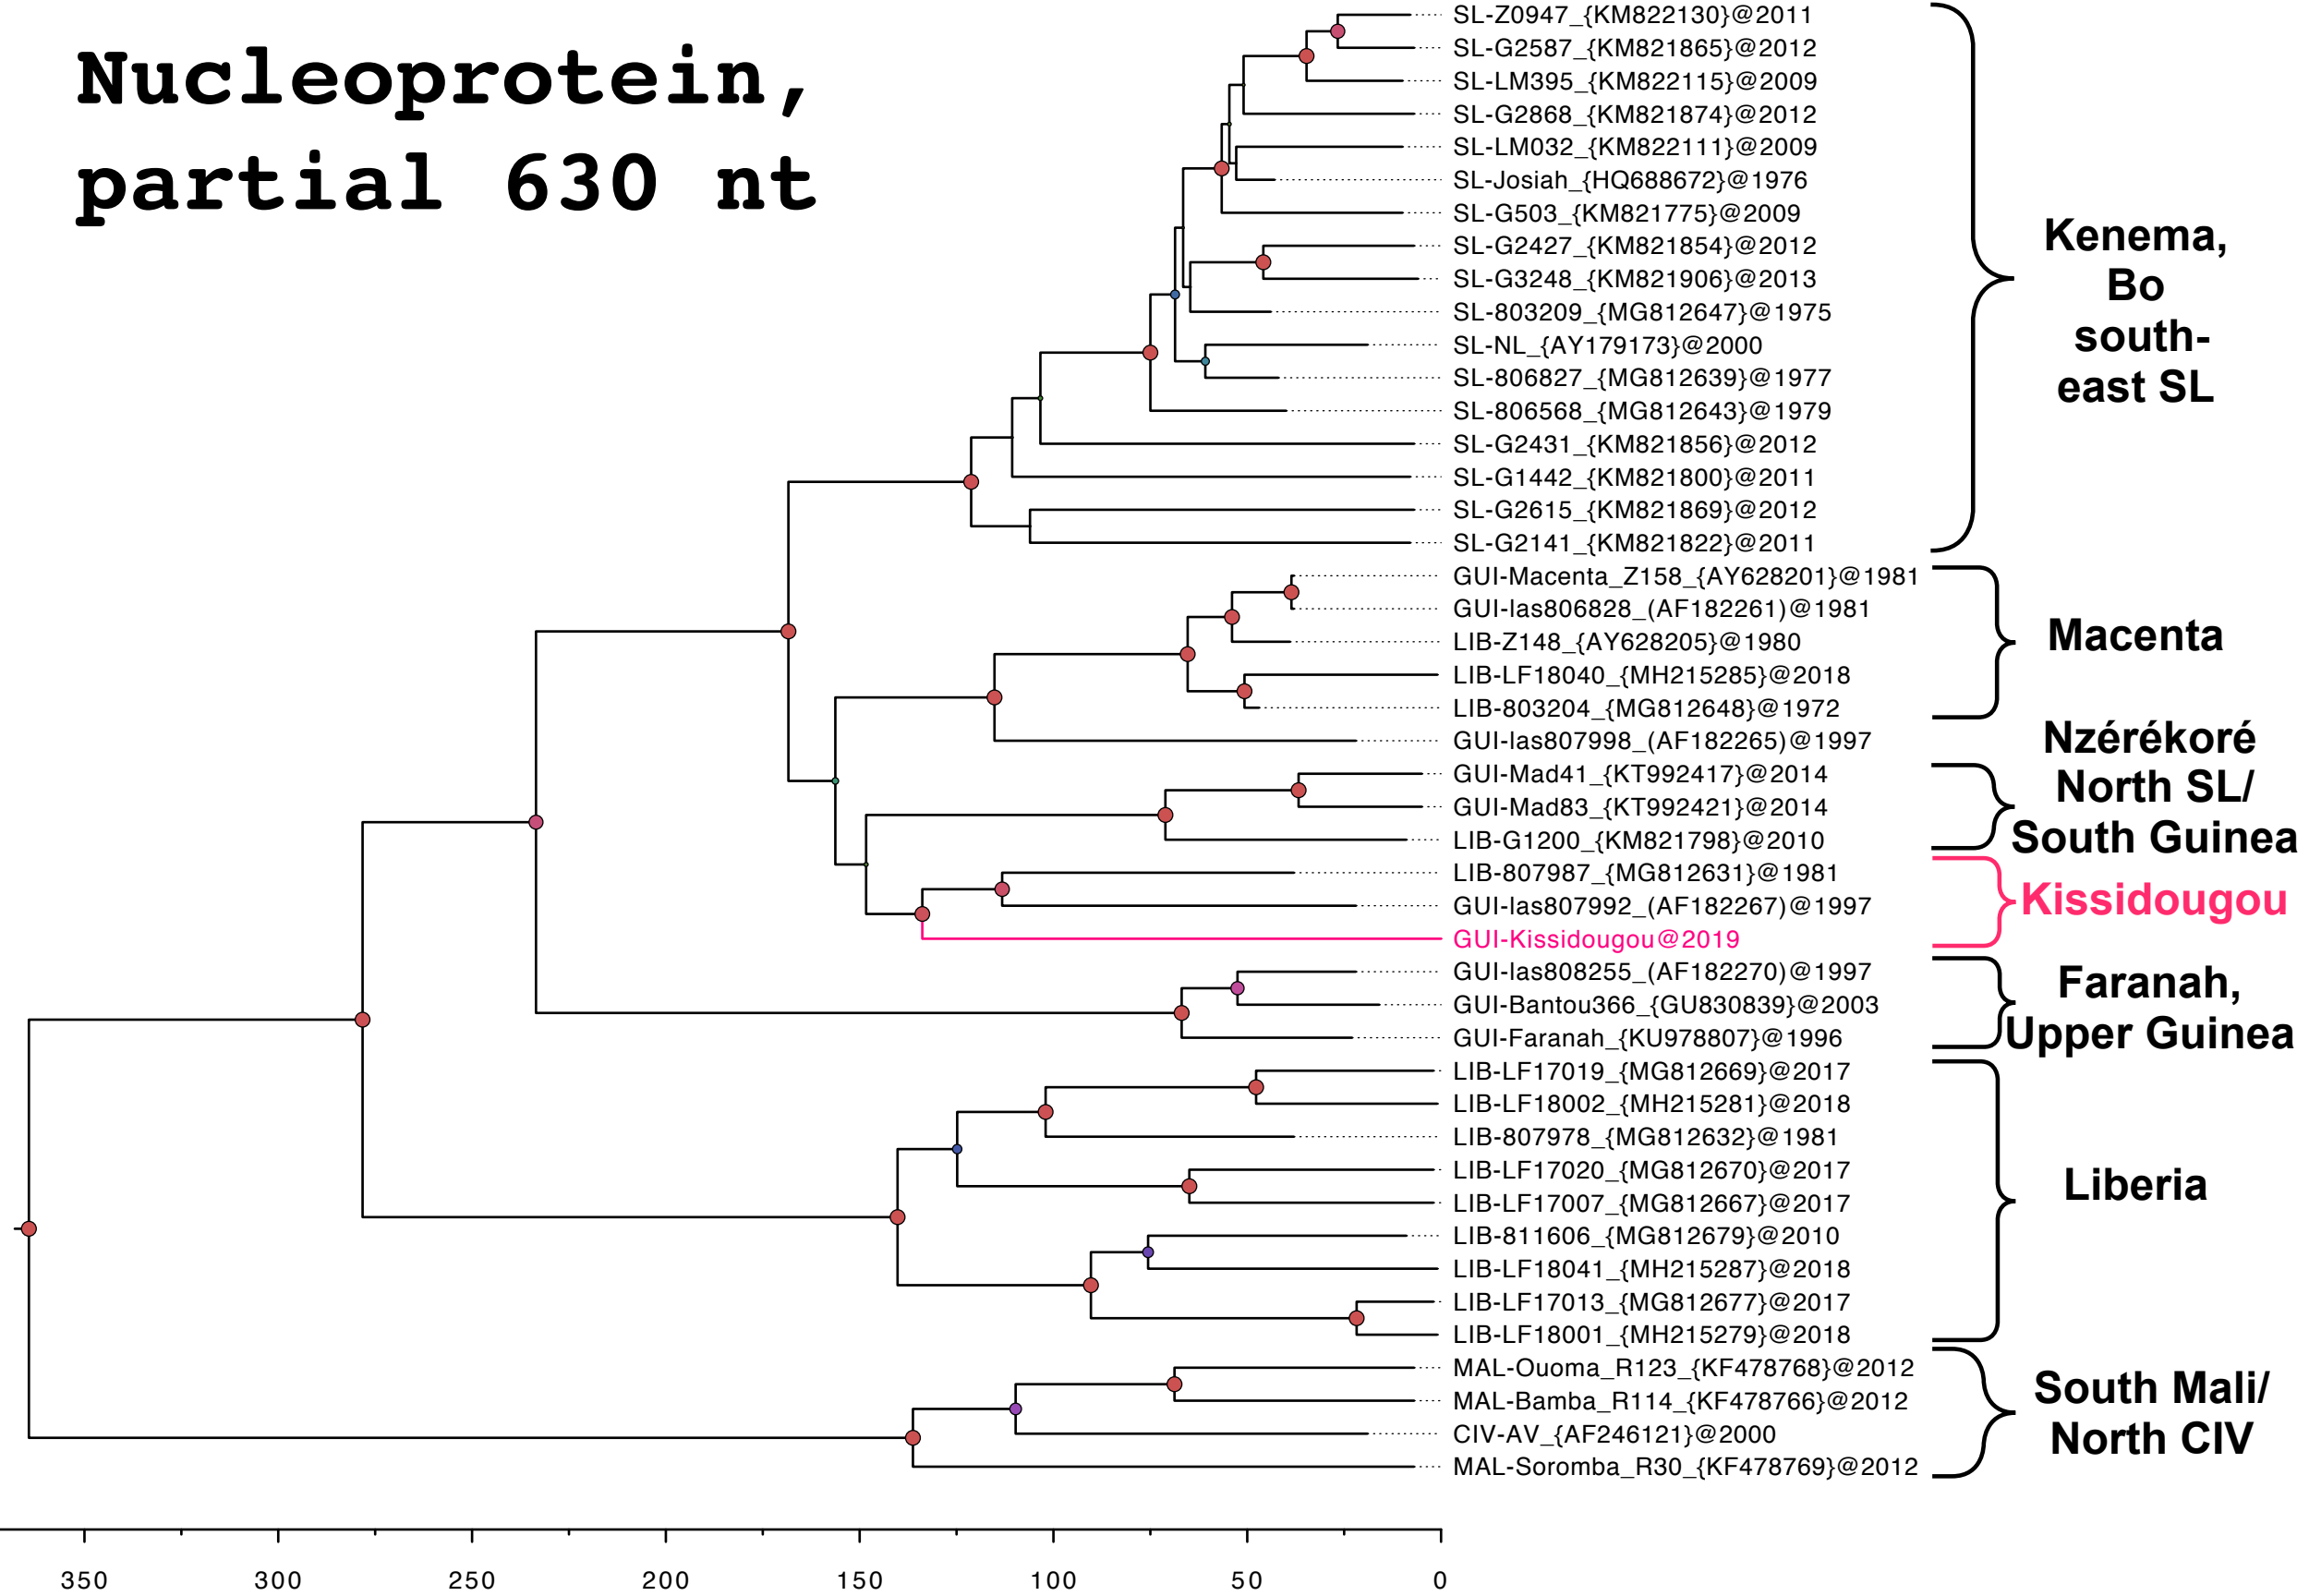

Supplement: s1 [file s1]
